# Supplementary material
Source: publisher figshare collection journal article supplement (https://frontiersin.figshare.com/ndownloader/files/29111649)
Supplement: Supplementary file [file 29111649]

Supplementary Table 1. Sixty-eight CH cases harboring digenic variants and the distribution of genes

| Cases  | TSHR    | TG            | DUOX2        | TPO     | DUOX2      | IYD     | SLC26A4 | DUOX1   | Reference               |
|--------|---------|---------------|--------------|---------|------------|---------|---------|---------|-------------------------|
| 1      | p.R450H |               | p.E327*      |         |            |         |         |         | Abe,et al.,2018         |
| 2/3†   | p.R450H |               | p.K530*      |         |            |         |         |         |                         |
| 4      | p.R450H |               | p.V779M      |         |            |         |         |         |                         |
| 5      | p.R109Q |               | p.K530*      |         |            |         |         |         | Fan,et al.,2017         |
| 6      |         | p.P1012L      | p.E879K      |         |            |         |         |         |                         |
| 7      | p.R109Q |               | p.R1211H     |         |            |         |         |         | Fang,et al.,2019        |
| 8      | p.V354I |               | p.R885L      |         |            |         |         |         |                         |
| 9      | p.K751R |               | p.N476K      |         |            |         |         |         |                         |
| 10     | p.A204V |               | p.G1513R     |         |            |         |         |         |                         |
| 11     | p.M164K |               | p.R885Q      |         |            |         |         |         |                         |
| 12     | p.Y613C |               | p.K530*      |         |            |         |         |         | Fu,et al.,2016          |
| 13     | p.R109Q |               | p.K530*      |         |            |         |         |         |                         |
| 14     | p.696C  |               | p.E879K      |         |            |         |         |         |                         |
| 15     | p.A526T | IVS3 + 2T > G |              |         |            |         |         |         |                         |
| 16     | p.G132R |               | p.H678R      |         |            |         |         |         | Jin,et al.,2014         |
| 17     | p.R450H |               | p.A1123T     |         |            |         |         |         |                         |
| 18     |         | p.P118L       | p.P303R      |         |            |         |         |         | Löf,et al.,2016         |
| 19     |         | p.S1139L      |              |         |            |         | p.L597S |         |                         |
| 20     | p.G245S |               | p.S965fs*30  |         |            |         |         |         | Makretskaya,et al.,2018 |
| 21     |         | p.R2185W      |              | p.P70A  |            |         |         |         |                         |
| 22     |         | p.R152H       |              | p.S97*  |            |         |         |         |                         |
| 23     |         | p.P1494L      |              | p.V484M |            |         |         |         |                         |
| 24     |         |               | p.R1535G     | p.T321I |            |         |         |         |                         |
| 25     |         |               | p.S965fs*30  |         |            |         | p.M147I |         |                         |
| 26     |         | p.A993T       |              |         |            | p.T273M |         |         |                         |
| 27     |         | p.Q1644E      |              | p.R491H |            |         |         |         | Nicholas,et al.,2016    |
| 28     | p.C41S  |               | p.Q202Tfs    |         |            |         |         |         | Sasivari,et al.,2019    |
| 29     | p.R450H |               | p.K628Rfs*11 |         |            |         |         |         | Yamaguchi,et al.,2020   |
| 30     | p.R310H |               | p.G488R      |         |            |         |         |         |                         |
| 31     | p.R450H |               |              |         | p.V154M    |         |         |         |                         |
| 32     | p.G245S | p.P695S       |              |         |            |         |         |         |                         |
| 33     | p.R450H | p.K2733M      |              |         |            |         |         |         |                         |
| 34/35† |         | p.R1066H      | p.G488R      |         |            |         |         |         |                         |
| 36     |         | p.R1998*      | p.S965L      |         |            |         |         |         |                         |
| 37     |         | p.R1066H      | p.A1060V     |         |            |         |         |         |                         |
| 38     |         | p.V129I       |              | p.R367* |            |         |         |         |                         |
| 39     |         | p.P1029Pfs*2  | p.E973K      |         |            |         |         |         |                         |
| 40     |         | p.Q830E       | p.V779M      |         |            |         |         |         |                         |
| 41     |         | p.P777L       |              |         |            | p.Y138* |         |         |                         |
| 42     |         |               | p.K628Rfs*11 |         |            | p.S37R  |         |         |                         |
| 43     |         |               | p.E879K      |         |            |         |         | p.R139S |                         |
| 44     |         |               | p.R885Q      |         | c.554+5C>T |         |         |         | Zheng,et al.,2016       |

|     |         |                    |              |         |         |   |         |          |     |                   |
|-----|---------|--------------------|--------------|---------|---------|---|---------|----------|-----|-------------------|
| 45  | p.G227R | p.N43Y             |              |         |         |   |         |          |     |                   |
| 46  | p.F525S | p.L203_P207delinsP |              |         |         |   |         |          |     |                   |
| 47  | p.G245A | p.K117Sfs*12       |              |         |         |   |         |          |     |                   |
| 48  |         | p.S2254Mfs*88      | p.R885L      |         |         |   |         |          |     |                   |
| 49  |         | p.W769*            | p.K117Sfs*12 |         |         |   |         |          |     | This study        |
| 50  |         |                    | p.L1343F     | p.Y246* |         |   |         |          |     |                   |
| 51  |         |                    | p.L320P      | p.Y246* |         |   |         |          |     |                   |
| 52  |         | p.D1014N           |              | p.F31L  |         |   |         |          |     |                   |
| 53  |         | p.R1270C           |              | p.Y138* |         |   |         |          |     |                   |
| 54  |         | p.I1931V           | p.P883S      |         |         |   |         |          |     |                   |
| 55  |         | p.I444V            | p.M1132K     |         |         |   |         |          |     |                   |
| 56  | p.R109Q |                    | p.R1211H     |         |         |   |         |          |     | Sun,et al.,2018   |
| 57  |         |                    | p.G624Afs*15 |         |         |   |         | p.T1079N |     |                   |
| 58  |         | p.R1829P           |              |         |         |   | p.I363L |          |     |                   |
| 59  |         |                    |              |         | p.M236V |   |         | p.R50Q   |     |                   |
| 60  |         | p.T728K            | p.R1211C     |         |         |   |         |          |     |                   |
| 61  |         |                    |              |         |         |   |         |          |     |                   |
| 62  |         |                    |              |         |         |   |         |          |     |                   |
| 63  |         |                    |              |         |         |   |         |          |     |                   |
| 64  |         |                    |              |         |         |   |         |          |     | Long,et al.,2018  |
| 65  |         |                    |              |         |         |   |         |          |     |                   |
| 66  |         |                    |              |         |         |   |         |          |     |                   |
| 67  |         |                    |              |         |         |   |         |          |     |                   |
| 68  |         |                    |              |         |         |   |         |          |     | Matsuo,et al.2016 |
| Sum | 31      | 31                 | 48           | 10      | 8       | 2 | 3       | 3        | 136 |                   |

The reference gene version is GRCh37/hg19. *DUOX2*(NM\_014080.4), dual oxidase 2; *DUOXA2* (NM\_207581.4),dual oxidase maturation factor 2; *TSHR*(NM\_000369.2),TSH receptor; *TG* (NM\_003235.4), thyroglobulin ; *TPO* (NM\_000547.5), thyroid peroxidase; *IYD* (NM\_203395), iodotyrosine deiodinase; *SLC26A4* (PDS) (NM\_000441), solute carrier family 26 member 4; *DUOX1* (NM\_017434.5), dual oxidase 1

†, two cases with the same genotype
